# Supplementary material for: Reliability and accuracy of EEG interpretation for estimating age in preterm infants
Source: PubMed Central journal article supplement (PMC7480927; doi:10.1002/acn3.51132), 2020-08-07
Supplement: ACN3-7-1564-s001.pdf [file ACN3-7-1564-s001.pdf]

**TABLES FOR SUPPORTING INFORMATION**

**Table S1:** Clinical description of the groups used in the study. Outcome was assessed at either 1 or 2y of age using the Bayley Scales of Developmental Outcome examination (Austrian Norms) – the minimum score across cognitive, language and motor outcomes was used to define 3 grades of outcome: normal was a score greater than 85, mildly abnormal was a score between 70 and 85, and abnormal was a score less than 70. \* Several recordings met more than one exclusion criteria.

|                                              | ICC group                              | PMA group                              |
|----------------------------------------------|----------------------------------------|----------------------------------------|
| infants (n)                                  | 62                                     | 61                                     |
| gestational age (weeks)                      | 25.7 ± 1.5                             | 25.7 ± 1.5                             |
| birth weight (g) <sup>a</sup>                | 736 ± 183                              | 736 ± 184                              |
| sex (m:f) <sup>a</sup>                       | 31:30                                  | 31:29                                  |
| Conditions\pathology                         |                                        |                                        |
| intraventricular hemorrhage                  | 13 (I/II = 10, III/IV = 3)             | 13 (I/II = 10, III/IV = 3)             |
| periventricular leukomalacia                 | 1 (I/II = 1)                           | 1 (I/II = 1)                           |
| necrotizing enterocolitis                    | 2                                      | 2                                      |
| chronic lung disease                         | 18                                     | 18                                     |
| Bayles Scales of Infant Development Outcomes |                                        |                                        |
| Normal                                       | 20                                     | 20                                     |
| Mild Abnormal                                | 17                                     | 17                                     |
| Abnormal                                     | 15                                     | 14                                     |
| Lost to Follow Up                            | 10                                     | 10                                     |
| EEG recordings (n)                           | 179                                    | 146                                    |
| PMA of EEG recording (weeks)                 | 31.6 ± 3.3<br>[min = 25.0; max = 38.0] | 31.4 ± 3.1<br>[min = 25.0; max = 37.8] |
| Medications at EEG recording                 |                                        |                                        |
| No medication                                | 13                                     | 8                                      |
| Caffeine                                     | 152                                    | 127                                    |
| Morphine                                     | 5                                      | 5                                      |
| Doxapram                                     | 5                                      | 4                                      |
| Anticonvulsants                              | 0                                      | 0                                      |
| Missing data                                 | 9                                      | 6                                      |
| Abnormal EEG recordings                      | 54                                     | 49                                     |
| Excluded Recordings*                         |                                        |                                        |
| Artefact                                     | 22                                     | 22                                     |
| Limited Duration                             | 17                                     | 10                                     |
| Missing Data                                 | 37                                     | 9                                      |

**Table S2:** The correlation between the visual interpretation of EEG/aEEG and PMA. Note, the sample size is  $n = 146$ , in order to compare correlations to the output of the FBA algorithm.

| EEG Reviewer      | Correlation, $r$ (95%CI) | aEEG Reviewer      | Correlation, $r$ (95%CI) |
|-------------------|--------------------------|--------------------|--------------------------|
| R1 <sub>EEG</sub> | 0.813 (0.715-0.886)      | R1 <sub>aEEG</sub> | 0.750 (0.660-0.836)      |
| R2 <sub>EEG</sub> | 0.560 (0.409-0.684)      | R2 <sub>aEEG</sub> | 0.793 (0.753-0.835)      |
| R3 <sub>EEG</sub> | 0.809 (0.761-0.857)      | R3 <sub>aEEG</sub> | 0.722 (0.655-0.789)      |
| R4 <sub>EEG</sub> | 0.727 (0.627-0.819)      |                    |                          |

**Table S3:** Agreement between the average visual interpretation of EEG/aEEG, PMA and an automated estimate of EEG functional brain age (FBA). Note, the sample size is reduced ( $n = 146$ ) as the FBA algorithm rejected additional EEG recordings from analysis.

|             | Correlation, $r$ (95%CI) | $\pm 1$ week (%) | $\pm 2$ weeks (%) |
|-------------|--------------------------|------------------|-------------------|
| FBA vs PMA  | 0.938 (0.926-0.963)      | 63 (54-75)       | 92 (87-97)        |
| EEG vs FBA  | 0.870 (0.834-0.912)      | 42 (34-50)       | 75 (68-85)        |
| EEG vs PMA  | 0.840 (0.794-0.889)      | 38 (28-47)       | 71 (63-80)        |
| aEEG vs FBA | 0.835 (0.789-0.881)      | 27 (21-36)       | 54 (46-67)        |
| aEEG vs PMA | 0.818 (0.769-0.865)      | 32 (25-41)       | 51 (43-63)        |

**Table S4:** The systematic and random error between the visual interpretation of EEG/aEEG and PMA. Note, the sample size is  $n = 146$ , in order to compare correlations to the output of the FBA algorithm.

| EEG Reviewer                   | Systematic (95%CI) | Random (95%CI) | aEEG Reviewer                   | Systematic (95% CI) | Random (95% CI) |
|--------------------------------|--------------------|----------------|---------------------------------|---------------------|-----------------|
| R1 <sub>EEG</sub>              | 0.3 (0.0 to 0.6)   | 1.9 (1.5-2.3)  | R1 <sub>aEEG</sub>              | -1.6 (-1.9 to -1.2) | 2.0 (1.6-2.3)   |
| R2 <sub>EEG</sub>              | 2.4 (1.7 to 2.9)   | 3.0 (2.6-3.4)  | R2 <sub>aEEG</sub>              | -1.5 (-1.9 to -1.1) | 2.2 (2.0-2.5)   |
| R3 <sub>EEG</sub>              | 2.2 (1.8 to 2.6)   | 2.3 (2.0-2.4)  | R3 <sub>aEEG</sub>              | -2.2 (-2.6 to -1.7) | 2.0 (1.8-2.4)   |
| R4 <sub>EEG</sub>              | -1.3 (-1.9 to 0.9) | 2.2 (1.8-2.6)  |                                 |                     |                 |
| R <sup>AV</sup> <sub>EEG</sub> | 0.8 (0.4 to 1.2)   | 1.7 (1.5-1.9)  | R <sup>AV</sup> <sub>aEEG</sub> | -1.8 (-2.2 to -1.4) | 1.8 (1.6-2.0)   |

**FIGURES FOR SUPPORTING INFORMATION**

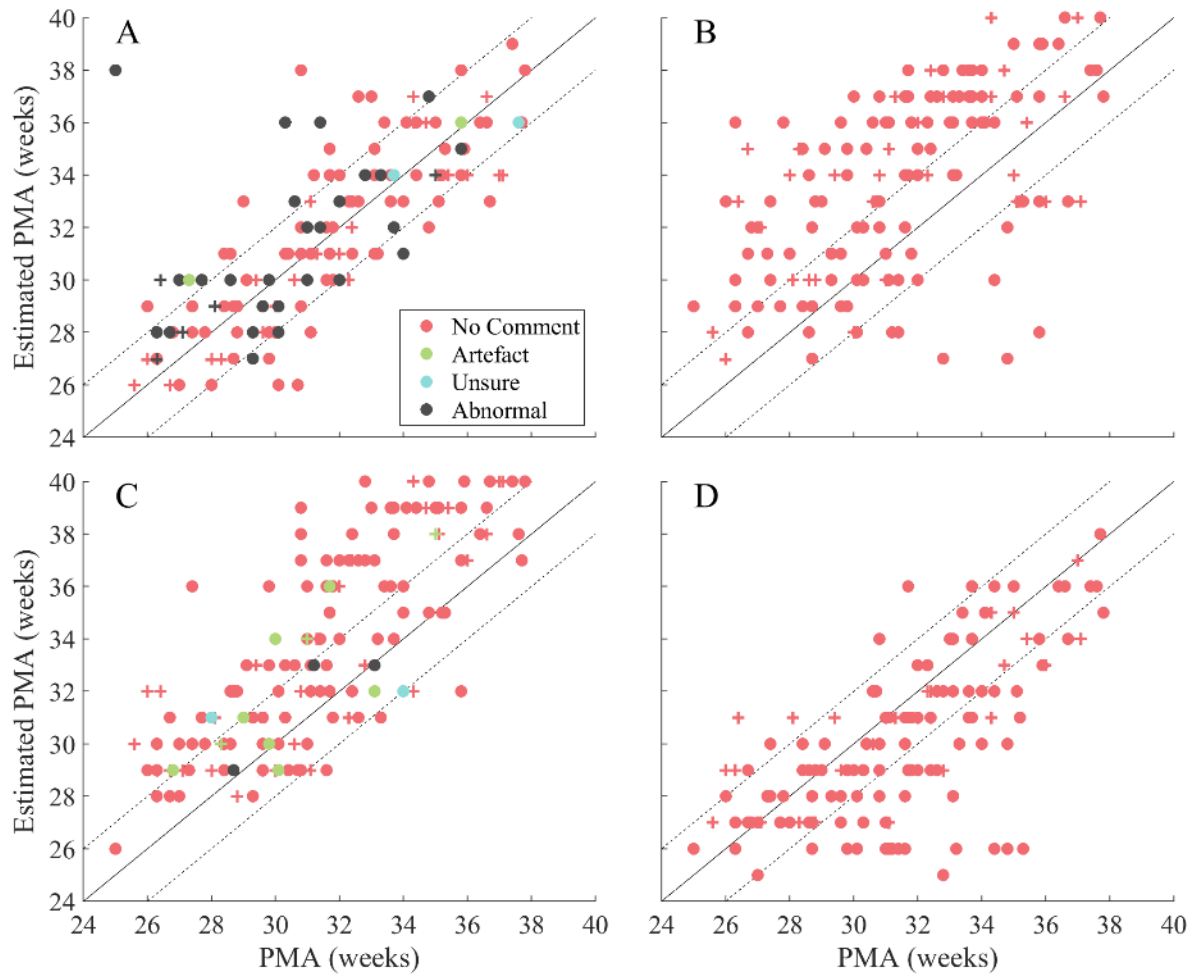

**Figure S1:** PMA estimated using the visual interpretation of the EEG encoded based on reviewers comments and diagnosis. Estimated PMA is from the visual interpretation of the EEG and PMA is defined as the gestational age plus the post-natal age. A) Reviewer 1, B) Reviewer 2, C) Reviewer 3, D) Reviewer 4. Markers denote a diagnosis of a brain lesion – o denotes recording from infants without IVH/PVL, + denotes recordings from infants with IVH/PVL.

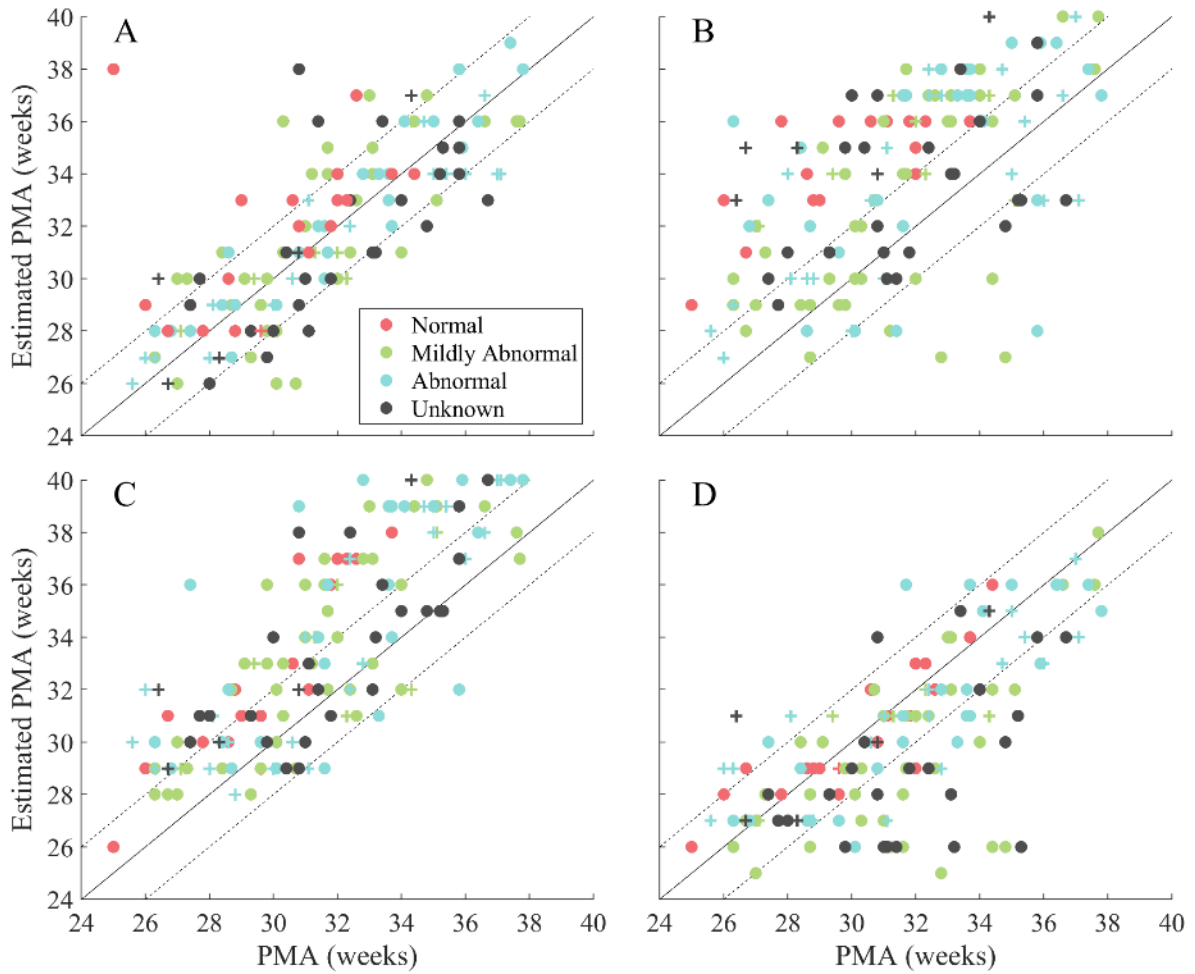

**Figure S2:** PMA estimated using the visual interpretation of the EEG encoded based on neurodevelopmental outcome and diagnosis. Estimated PMA is from the visual interpretation of the EEG and PMA is defined as the gestational age plus the post-natal age. A) Reviewer 1, B) Reviewer 2, C) Reviewer 3, D) Reviewer 4. Markers denote a diagnosis of a brain lesion – o denotes recording from infants without IVH/PVL, + denoted recordings from infants with IVH/PVL.

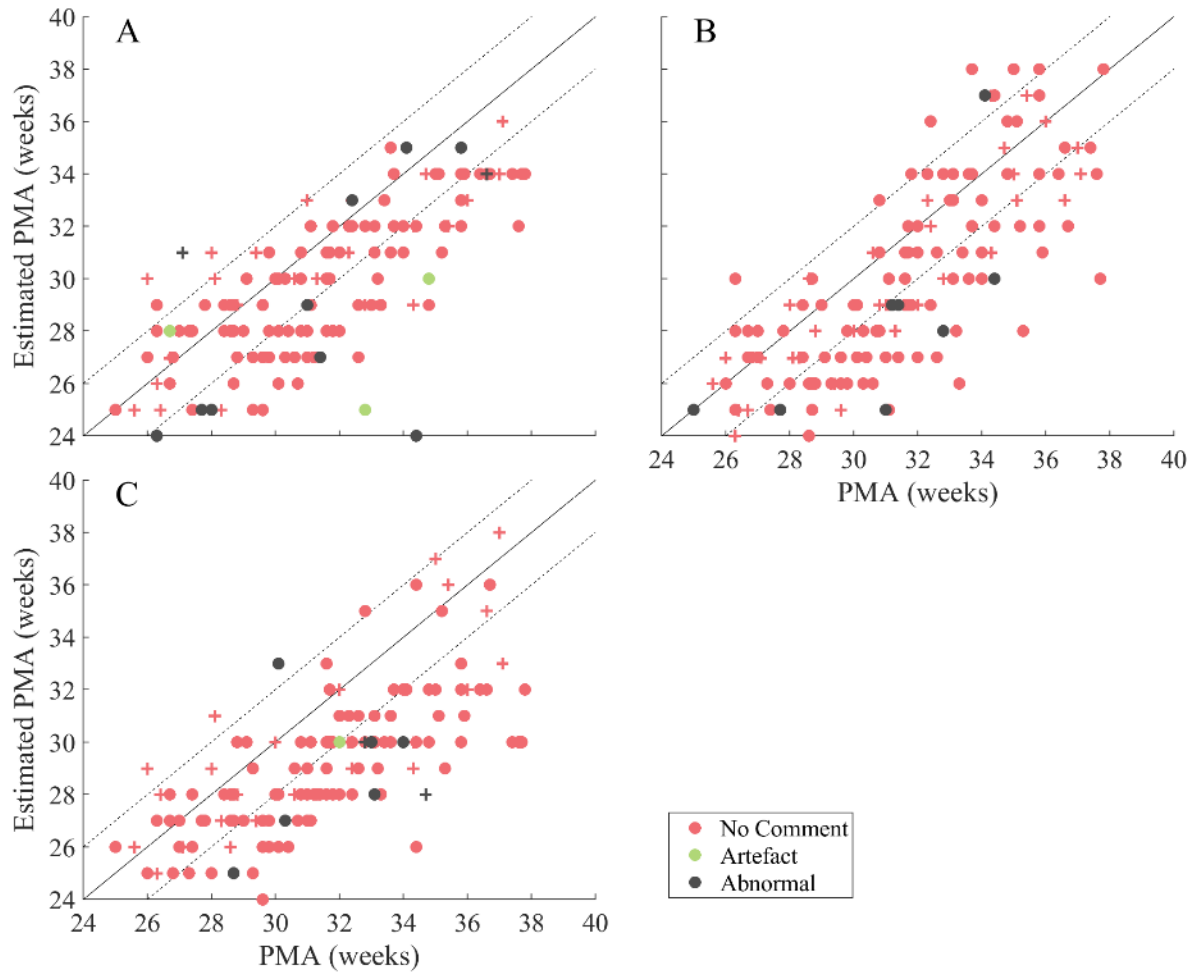

**Figure S3:** PMA estimated using the visual interpretation of the aEEG encoded based on reviewers comments and diagnosis. Estimated PMA is from the visual interpretation of the aEEG and PMA is defined as the gestational age plus the post-natal age. A) Reviewer 1, B) Reviewer 2, C) Reviewer 3. Markers denote a diagnosis of a brain lesion – o denotes recording from infants without IVH/PVL, + denotes recordings from infants with IVH/PVL.

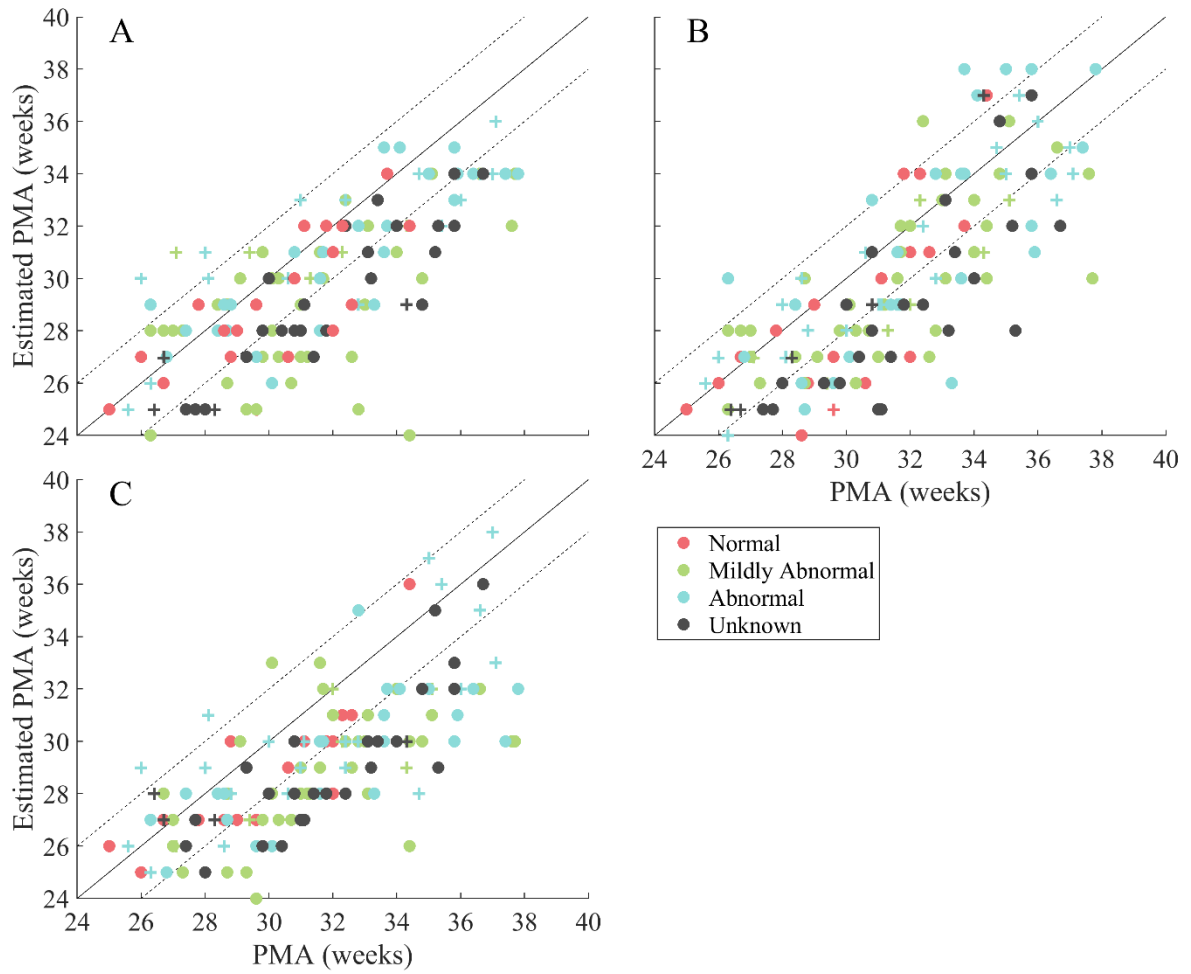

**Figure S4:** PMA estimated using the visual interpretation of the aEEG encoded based on neurodevelopmental outcome and diagnosis. Estimated PMA is from the visual interpretation of the aEEG and PMA is defined as the gestational age plus the post-natal age. A) Reviewer 1, B) Reviewer 2, C) Reviewer 3. Markers denote a diagnosis of a brain lesion – o denotes recording from infants without IVH/PVL, + denotes recordings from infants with IVH/PVL.
